# Supplementary material for: New hybrid materials based on the grafting of Pd(ii)-amino complexes on the graphitic surface of AC: preparation, structures and catalytic properties
Source: Royal Society of Chemistry journal article supplement (doi:10.1039/c6ra08858a), 2016-01-01
Supplement: c6ra08858a1.pdf [file c6ra08858a1.pdf]

## Supplementary Information (SI)

### **New hybrid materials based on the grafting of Pd(II)-amino complexes on the graphitic surface of AC: Preparation, structures and catalytic properties**

M. Luz Godino-Salido,<sup>a,\*</sup> María D. Gutiérrez-Valero,<sup>a</sup> Rafael López-Garzón,<sup>a</sup> Paloma Arranz-Mascarós,<sup>a</sup> Antonio Santiago-Medina,<sup>a</sup> Manuel Melguizo,<sup>a</sup> María Domingo-García,<sup>b</sup> F. Javier López-Garzón,<sup>b</sup> Victor K. Abdelkader-Fernández,<sup>b</sup> Concepción Salinas-Martínez de Lecea,<sup>c</sup> M. Carmen Román-Martínez<sup>c</sup>

<sup>a</sup>Departamento de Química Inorgánica y Orgánica. Facultad de Ciencias Experimentales. Universidad de Jaén, 23071, Jaén, Spain

<sup>b</sup>Departamento de Química Inorgánica. Facultad de Ciencias. Universidad de Granada, 18071, Granada, Spain.

<sup>c</sup>Departamento de Química Inorgánica. Universidad de Alicante, Ap. 99, Alicante, Spain.

### **Contents**

- 1) Complexation of the Ar-S-F molecules with Pd(II)
- 2) Table S1
- 3) Figure S1

---

\* Corresponding author. Tel: +34 953212745; Fax: +34 953211876  
E-mail address: [mlgodino@ujaen.es](mailto:mlgodino@ujaen.es) (M. Luz Godino-Salido)

## 1) Complexation of the Ar-S-F molecules with Pd(II).

The complexation capacities of Lys and Tren to Pd(II) are needed because, as it is expected the adsorption of this metal ion by the Merck/Lys and Merck/Tren hybrids is produced by complexation.

In the case of Lys ligand it should be expected the complexing ability to be similar to the reported in the literature<sup>1,2</sup> for the free glycine, which bears the same complexing function than the anchored Lys ( $\text{Log } K_{\text{Gly-Pd}}$  between 11.21-12.25).

In the case of Tren, it has been carried out the study of the reactivity of Pd(II) with a ligand, L, whose complexing function ( $L = 2,2'$ -diamino-N-methyldiethylamine), is similar to the F function of Tren. This study was done by using L/Pd(II) mixtures in aqueous solution by using potentiometric methods, following a experimental procedure previously reported.<sup>3</sup> Due to the high stability of the Pd(II)-amino ligands complexes, for the determination of the stability constants by potentiometric techniques, it is required the presence of a competing ligand in the medium. Thus, they were carried out potentiometric titrations of 40 mL of and Pd(II)/L mixtures with 1/1 molar relationship ( $[\text{K}_2\text{PdCl}_4] = 10^{-3} \text{ M}$ ) in aqueous solution, at 298.1 K and  $[\text{KCl}] = 1 \text{ M}$  (which provided the competitive ligand  $\text{Cl}^-$ ), using 0.1M KOH as titrating agent. At least three titration experiments were performed in the pH range 2.5-10.5. The measurements ( $\text{pH} = -\log [\text{H}^+]$ ) were done with a 713 Methrom pH-mV meter, equipped with a combined glass electrode and connected to a Methron 765 Dosimat autoburette ( $1 \pm 0.001 \text{ mL}$ ). The system was calibrated as a hydrogen concentration probe by titrating known amounts of HCl with  $\text{CO}_2$ -free KOH.<sup>4,5</sup> The complex formation equilibria together to the stability constants and the species distribution plot were obtained as described in previous works.<sup>6,7</sup> The HYPERQUAD software<sup>8</sup> was used to calculate the equilibrium constants from the emf data.

## 2) Table S1

Table S1. Stability constants of Pd<sup>2+</sup> with L (L=2,2'-diamino-N-methyldiethylamine), determined by potentiometric measurements (1M KCl, 298.1K)

| Equilibrium                                                                   | log β     |
|-------------------------------------------------------------------------------|-----------|
| $\text{Pd}^{2+} + \text{Cl}^- + \text{L} \rightleftharpoons [\text{PdClL}]^+$ | 30.94(4)* |
| $\text{Pd}^{2+} + \text{L} + \text{OH}^- \rightleftharpoons [\text{PdLOH}]^+$ | 21.28(5)  |

Stability constants of the chloride complexes with Pd(II) are from ref. 9:  $\text{Pd}^{2+} + \text{Cl}^- \rightleftharpoons [\text{PdCl}]^+$ ,  $\log\beta=4.47$ ;  $\text{Pd}^{2+} + 2\text{Cl}^- \rightleftharpoons [\text{PdCl}_2]$ ,  $\log\beta = 7.74$ ;  $\text{Pd}^{2+} + 3\text{Cl}^- \rightleftharpoons [\text{PdCl}_3]^-$ ,  $\log\beta = 10.17$ ;  $\text{Pd}^{2+} + 4\text{Cl}^- \rightleftharpoons [\text{PdCl}_4]^{2-}$ ,  $\log\beta = 11.54$ .

Protonation constants of L are:  $\text{H}^+ + \text{L} \rightleftharpoons \text{HL}^+$ ,  $\log\beta = 9.76(2)$ ;  $2\text{H}^+ + \text{L} \rightleftharpoons \text{H}_2\text{L}^{2+}$ ,  $\log\beta = 19.34(2)$ ;  $3\text{H}^+ + \text{L} \rightleftharpoons \text{H}_3\text{L}^{3+}$ ,  $\log\beta = 23.11(2)$ .

\*From the stability constants of the chloride complex  $[\text{PdCl}]^+$  ( $\log\beta=4.47$ ) it should be estimated the stability constant of PdL complex to be  $\log K_{\text{PdL}}=26.47(2)$ .

## 3) Figure S1.

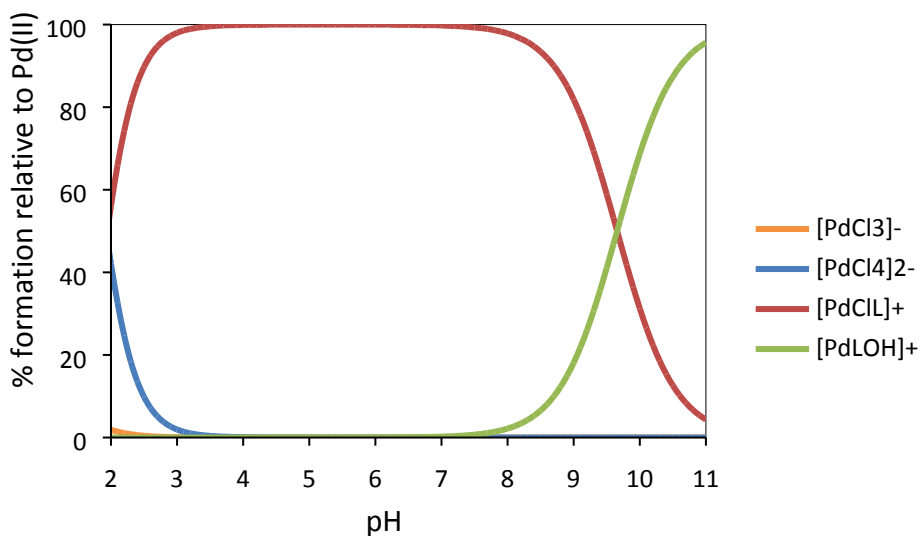

Figure S1. Distribution diagram of the species for the system L/Pd(II) (1 M KCl, 298.1K, [L]=10<sup>-3</sup>M, [Pd<sup>2+</sup>]=10<sup>-3</sup>M)

## References

---

1. L.D. Pettit, M. Bezer, *Coord. Chem. Rev.*, 1985, **61**, 97.
2. M. C. Lim, *J. Chem. Soc. Dalton Trans.*, 1978, 726.
3. M. L. Godino-Salido, M. D. Gutierrez-Valero, R. López-Garzón, J. M. Moreno-Sánchez, *Inorg. Chim. Acta*, 1994, **221**, 177.
4. G. Gran, *Analyst* 1952, 77, 661.
5. A. Liberti, T.S. Light, *J. Chem. Educ.* 1962, **39**, 236.
6. J. García-Martín, R. López-Garzón, M.L. Godino-Salido, R. Cuesta-Martos, M.D. Gutiérrez-Valero, P. Arranz-Mascarós, Helen Stoeckli-Evans, *Eur. J. Inorg. Chem.*, 2005, 3093.
7. M.D. Gutiérrez-Valero, M.L. Godino-Salido, P. Arranz-Mascarós, R. López-Garzón, R. Cuesta-Martos, J. García-Martín, *Langmuir*, 2007, **23**, 5995.
8. P. Gans, A. Sabatini, A. Vacca, *Talanta*, 1996, **43**, 807.
9. A.E. Martell, R.M. Smith, R.J. Motekaitis, *NIST Critically Selected Stability Constants of Metal Complexes Database*, version 7; Texas A & M University, College Station, TX, 2003.
